# Supplementary material for: Controlled synthesis and pH-sensitive complexation of poly(methacrylic acid) polyampholytes
Source: Royal Society of Chemistry journal article supplement (doi:10.1039/d4py00773e), 2024-01-01
Supplement: d4py00773e1.pdf [file d4py00773e1.pdf]

Electronic Supporting Information for  
Controlled synthesis and pH-sensitive complexation of poly(methacrylic acid)  
polyampholytes

Pavel Nikishau,<sup>1</sup> Veronika Kozlovskaya,<sup>1</sup> Eugenia Kharlampieva<sup>1, &\*</sup>

<sup>1</sup>Department of Chemistry, &Center for Nanoscale Materials and Biointegration, University of Alabama at Birmingham, Birmingham, AL 35294, USA

\*Correspondence to be addressed: ekharlam@uab.edu

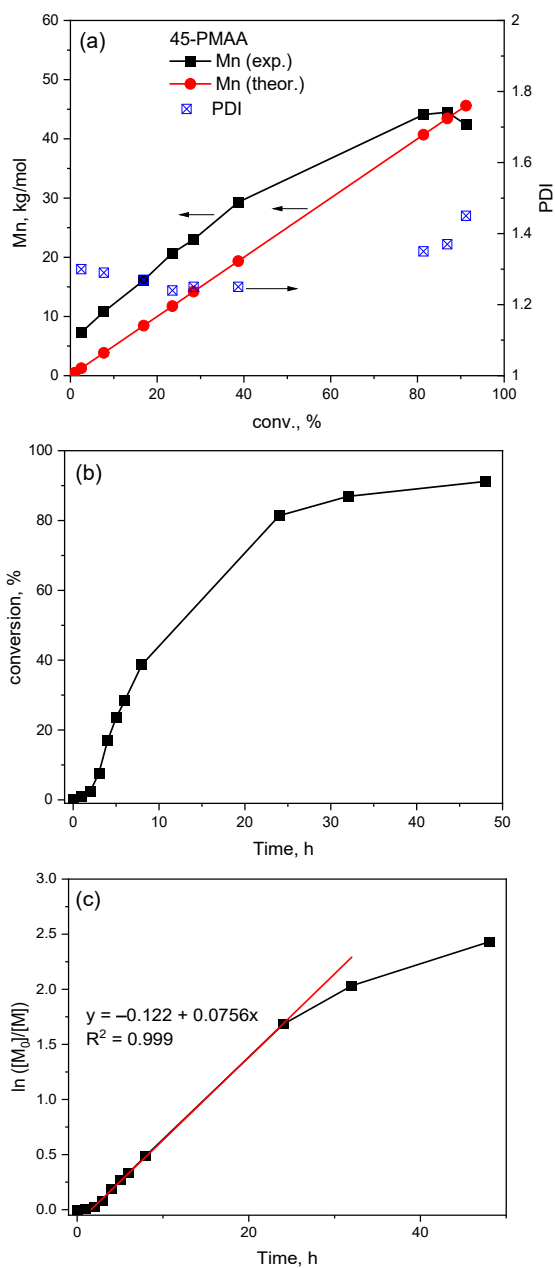

**Figure S1.** Dependence of  $M_n$  and  $\bar{D}$  on (a) conversion, (b) monomer consumption, and (c) first-order plot for *t*BMA homopolymerization by RAFT. The linear part of the first-order monomer plot has been fitted for clarity.

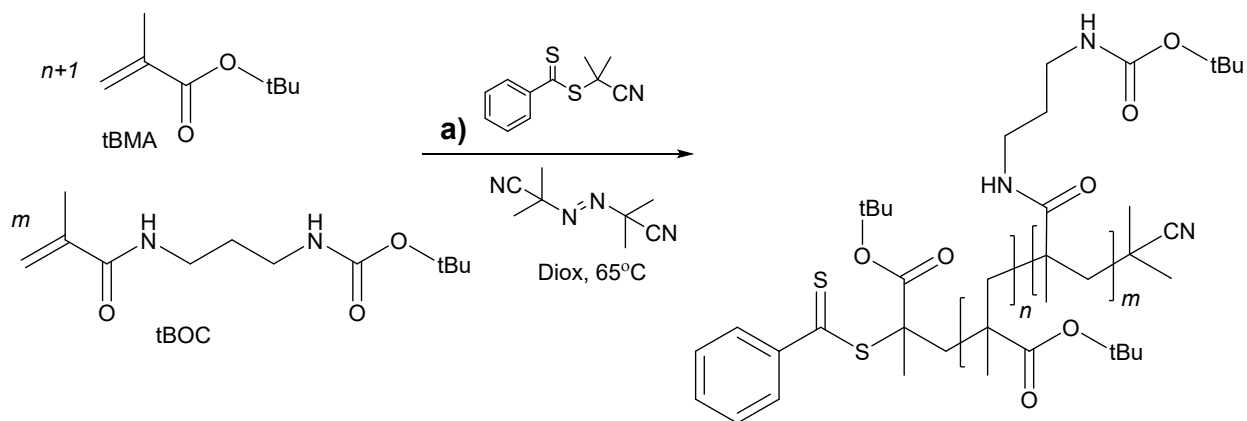

**Figure S2.** RAFT polymerization of *t*BMA and *t*BOC monomers to obtain poly(methacrylic acid-co-(aminopropyl)-methacrylamide) copolymers (PMAA-NH<sub>2</sub>).

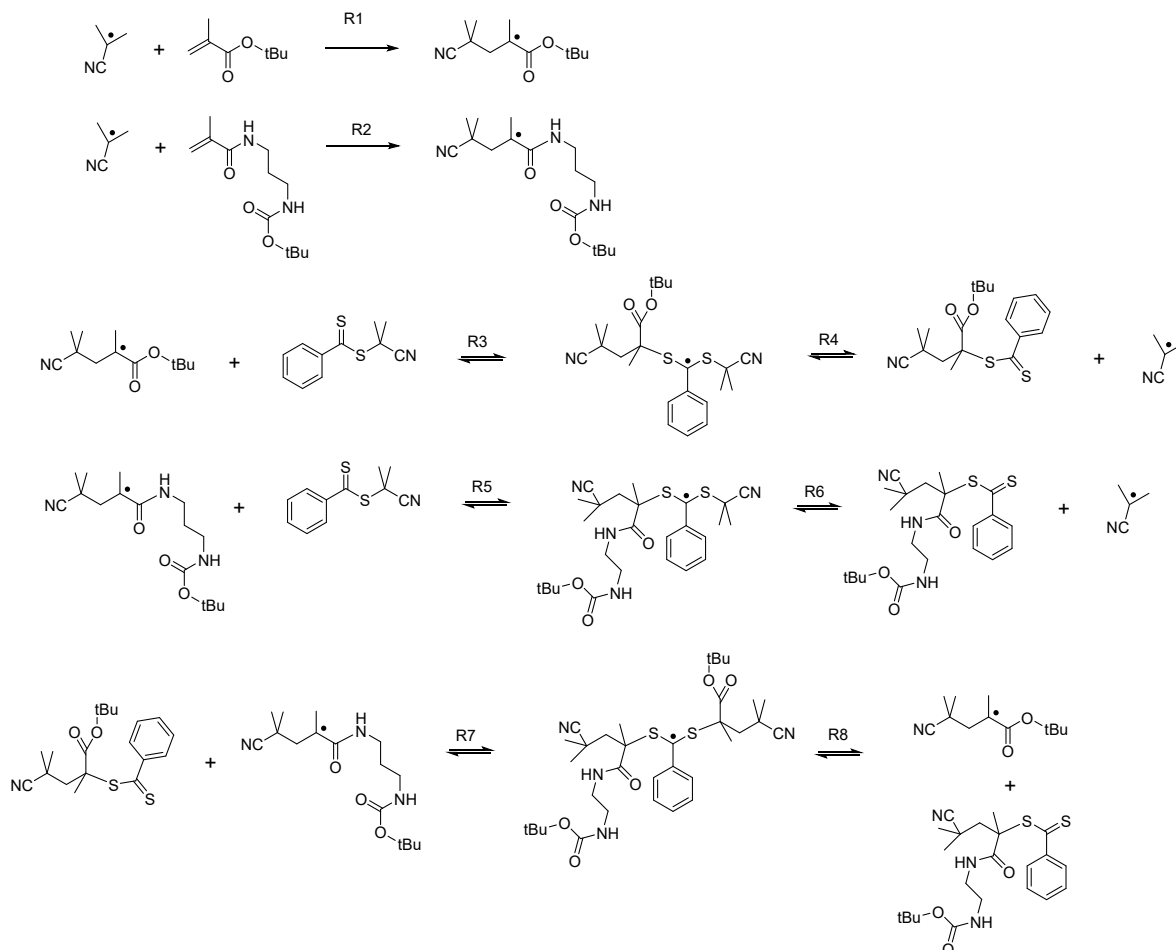

**Figure S3.** The monomer activities in RAFT polymerization were compared through comparing the energies of the R1-R8 reactions.

**Table S1.** Thermodynamic parameters for reactions **R1-R8**.

| Reaction | $\Delta_r H_{338}$ ,<br>kJ/mol | $\Delta_r S_{338}$ ,<br>J/(mol · K) | $\Delta_r G_{338}$ ,<br>kJ/mol | Reaction<br>Constant, $K_r$ |
|----------|--------------------------------|-------------------------------------|--------------------------------|-----------------------------|
| 1        | -23.4                          | -173.7                              | 35.4                           | 3.4E-06                     |
| 2        | -28.2                          | -285.3                              | 68.2                           | 2.9E-11                     |
| 3        | 21.4                           | -224.2                              | 97.2                           | 9.5E-16                     |
| 4        | 17.6                           | 210.5                               | -53.6                          | 1.9E+08                     |
| 5        | 29.7                           | -201.0                              | 97.7                           | 8.0E-16                     |
| 6        | 4.3                            | 183.3                               | -57.7                          | 8.2E+08                     |
| 7        | 2.0                            | -233.9                              | 81.1                           | 3.0E-13                     |
| 8        | -7.0                           | 229.9                               | -84.7                          | 1.2E+13                     |

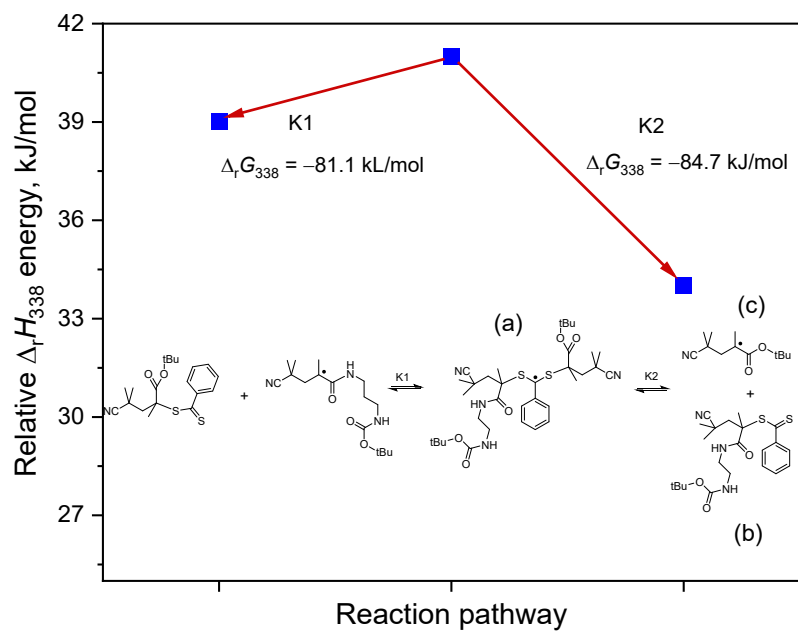

**Figure S4.** Relative energies ( $\Delta_r H_{338}$ ) and the schematic representation of studied reactions.

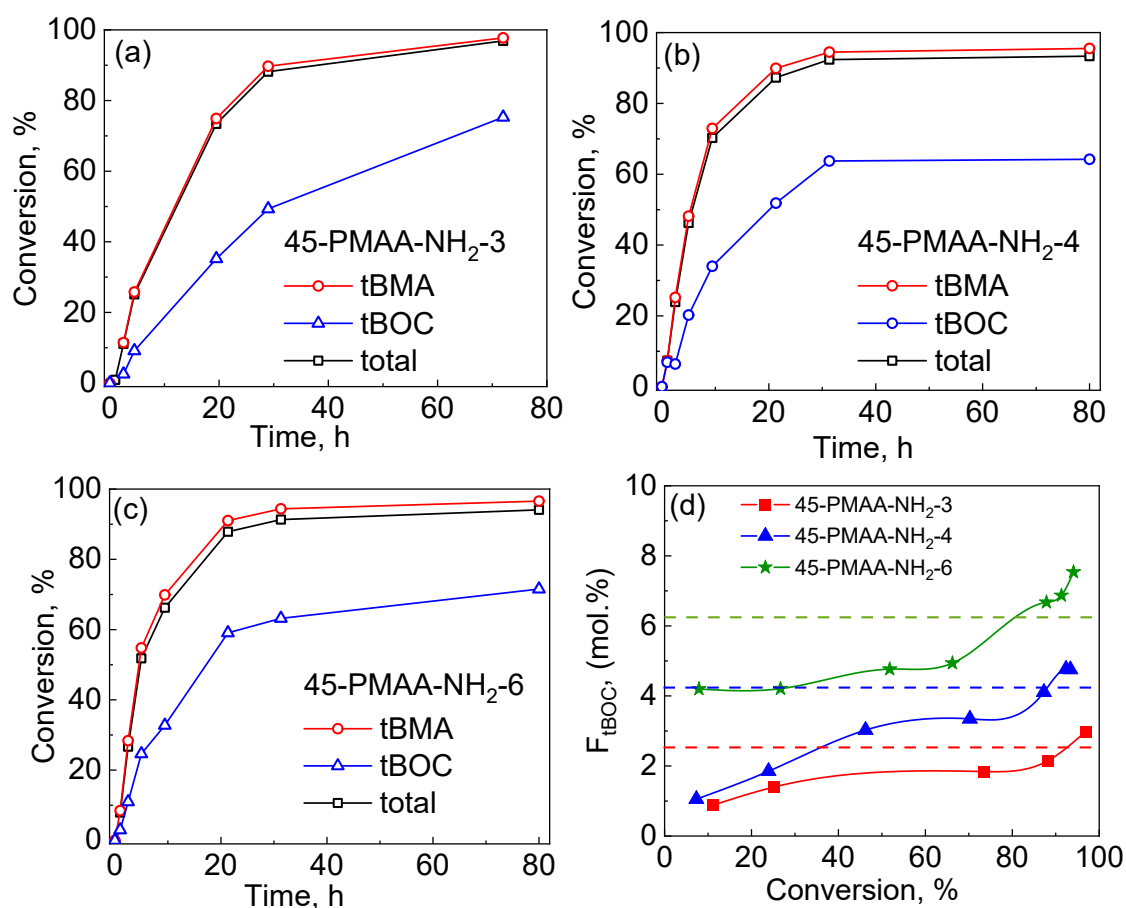

**Figure S5.** Consumption of *t*BMA and *t*BOC (a-c), and (d) incorporated fraction of *t*BOC ( $F_{tBOC}$ ) as a function of total monomer conversion for the RAFT-mediated copolymerization of *t*BMA and *t*BOC. Dashed lines in (d) correspond to the final mol.% content of NH<sub>2</sub> groups in copolymers.

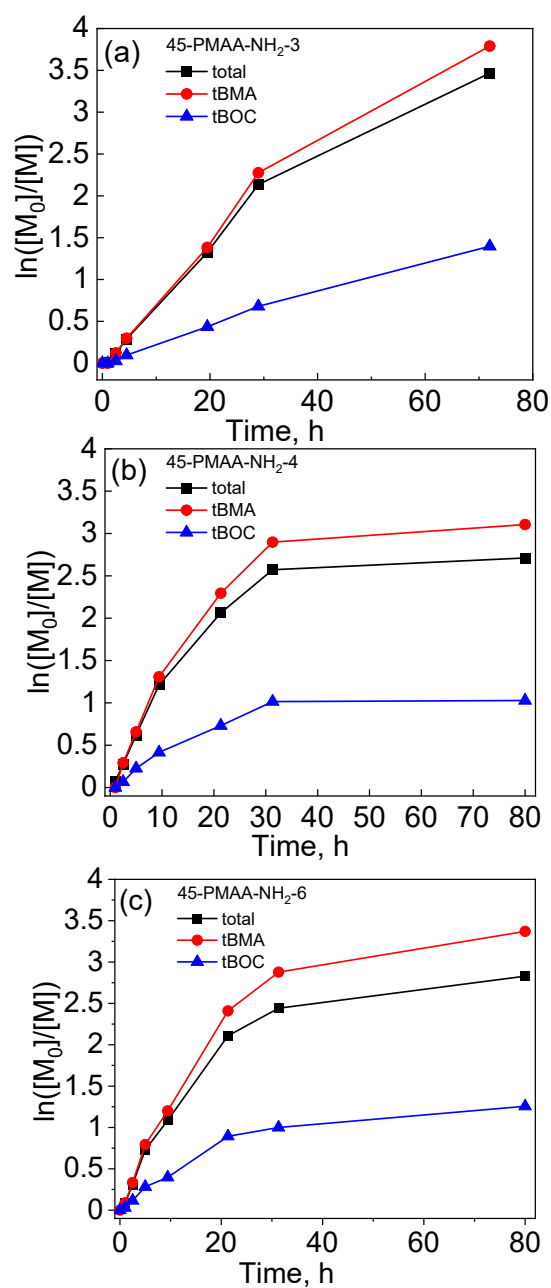

**Figure S6.** First-order plot for *t*BOC and *t*BMA copolymerization to obtain (a) 45-PMAA-NH<sub>2</sub>-3, (b) 45-PMAA-NH<sub>2</sub>-4, and (c) 45-PMAA-NH<sub>2</sub>-6.

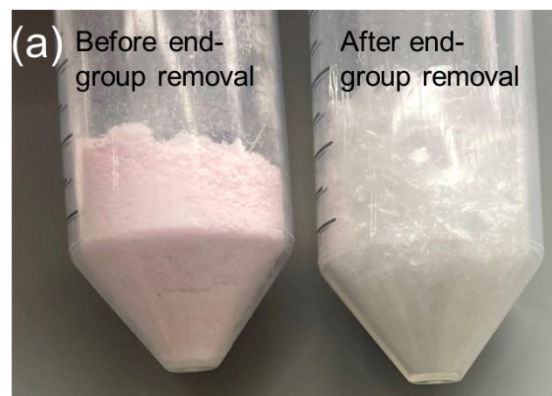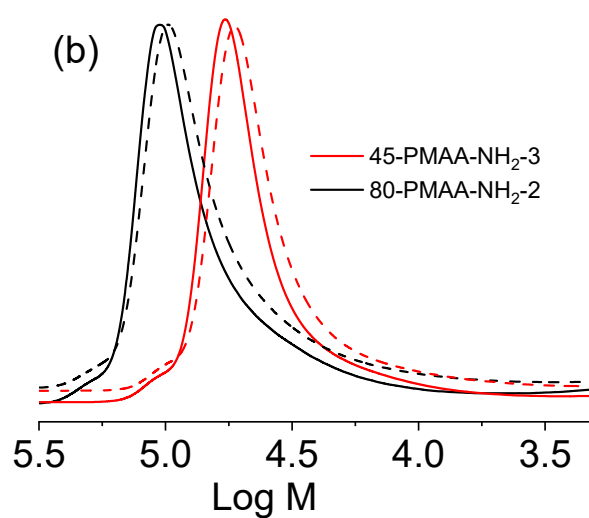

**Figure S7.** (a) A photograph of 45-PMAA-NH<sub>2</sub>-6 before (left) and after (right) end-group removal. (b) GPC analysis of 45-PMAA-NH<sub>2</sub>-3 and 80-PMAA-NH<sub>2</sub>-2 copolymers in THF (0.01 M TBAF) before (solid line) and after (dashed line) end-group removal.



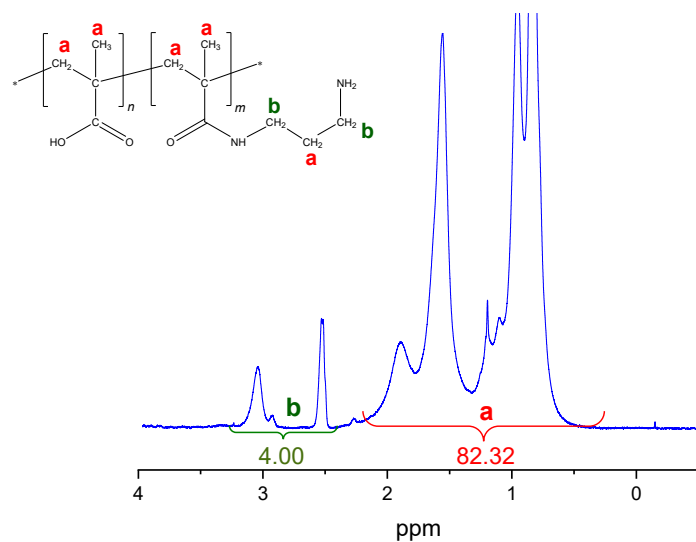

**Figure S8.**  $^1\text{H}$  NMR spectrum of 45-PMAA-NH<sub>2</sub>-6 (in D<sub>2</sub>O+NaOD) after hydrolysis of a tBOC protective group. The content of NH<sub>2</sub>-groups was calculated as follows:  $100\% \times [I(\text{b})/4]/[I(\text{b})/4 + \{I(\text{a}) - 7 \times I(\text{b})/4\}/5]$ , where  $I(\text{a})$  and  $I(\text{b})$  are the integral intensities of the signals a and b, respectively. Accordingly, the content of NH<sub>2</sub>-groups was calculated as follows:  $4.00/4/(4.00/4+(82.32-7.00)/5) \times 100\%$ .

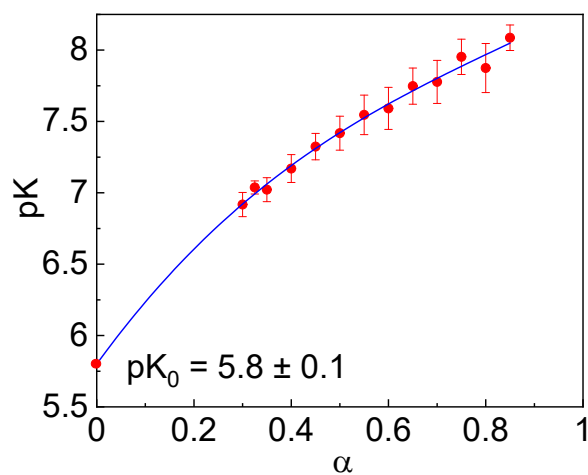

**Figure S9.** Potentiometric titration of 86 mg mL<sup>-1</sup> 45-PMAA homopolymer solution with 0.01 M NaOH solution.

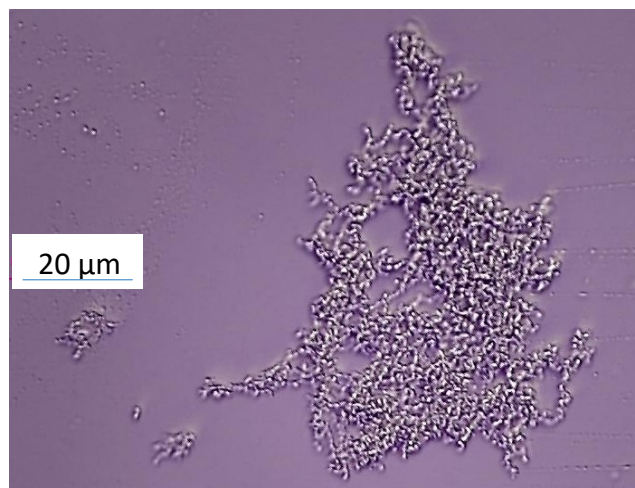

**Figure S10.** An optical image of the PAC formed from  $0.5 \text{ mg mL}^{-1}$  80-PMAA-NH<sub>2</sub>-6 solutions in 0.01 M HEPES buffer at pH = 3.4 and 0.20 M NaCl after 2 hours.
